# Supplementary material for: Epidemiology of Antimicrobial Resistance Genes in Streptococcus agalactiae Sequences from a Public Database in a One Health Perspective
Source: MDPI journal article supplement (doi:10.3390/antibiotics11091236), 2022-09-12
Supplement: s1 [file s1]

**Table S1.** Genetic location, molecular functions and drug class resistance induced by antibiotic resistance genes found in *Str.agalactiae* genome.

| Gene                                                                                                                                             | Location in genome                                                           | Molecular function           | Drug class                                                                    |
|--------------------------------------------------------------------------------------------------------------------------------------------------|------------------------------------------------------------------------------|------------------------------|-------------------------------------------------------------------------------|
| <i>tetM</i>                                                                                                                                      | Mobile element (transposon Tn916 family)                                     | Antibiotic target protection | Tetracycline                                                                  |
| <i>tetW</i>                                                                                                                                      | Mobile element (conjugative and non conjugative plasmid)                     |                              |                                                                               |
| <i>tetO</i> <sup>1</sup>                                                                                                                         | Chromosome                                                                   |                              |                                                                               |
| <i>tetS</i>                                                                                                                                      | Chromosome                                                                   |                              |                                                                               |
| <i>tet(44)</i>                                                                                                                                   | Mobile element                                                               |                              |                                                                               |
| <i>tetK</i>                                                                                                                                      | Mobile element (conjugative plasmid)                                         | Antibiotic efflux            |                                                                               |
| <i>tetL</i>                                                                                                                                      | Chromosome                                                                   |                              |                                                                               |
| <i>ermA, ermB</i> <sup>1</sup> , <i>ermT</i>                                                                                                     | Mobile element (conjugative plasmid pIP501 or ICESag37, or transposon Tn917) | Ribosomal alteration         | Macrolides, lincosamides and streptogramin B (MLS <sub>B</sub> ) <sup>2</sup> |
| <i>ant(6)Ia, aadE</i>                                                                                                                            | Chromosome/plasmid                                                           | Antibiotic inactivation      | Aminoglycosides                                                               |
| <i>aac(6′)-Ie-aph(2′′)-Ia</i>                                                                                                                    | Plasmid/transposon                                                           |                              |                                                                               |
| <i>Aph(3′)-Ia</i>                                                                                                                                | Chromosome                                                                   |                              |                                                                               |
| <i>sat-4</i>                                                                                                                                     | Mobile element (plasmid)                                                     |                              |                                                                               |
| <i>spw</i>                                                                                                                                       | Mobile element (plasmids and transposons)                                    |                              |                                                                               |
| <i>mefA</i> <sup>3</sup> , <i>msrD</i>                                                                                                           | Mobile element (Conjugative transposons Tn1207.1 or Tn1207.3)                | Antibiotic efflux            | Macrolides                                                                    |
| <i>catA16, catTC</i>                                                                                                                             | Mobile element (conjugative plasmid pIP501 or transposon)                    | Antibiotic inactivation      | Phenicol                                                                      |
| <i>catP</i>                                                                                                                                      | Chromosome and transposon                                                    |                              |                                                                               |
| <i>lnuB</i>                                                                                                                                      | Chromosome                                                                   | Antibiotic inactivation      | Lincosamides (L phenotype)                                                    |
| <i>Isa, IsaC, IsaE</i>                                                                                                                           | Mobile element (transposon)                                                  | Antibiotic efflux            | Lincosamides, streptogramin A, pleuromutilins (LSA and LSAP phenotypes)       |
| <i>blaTEM, blaTEM116</i>                                                                                                                         | Mobile element (plasmid)                                                     | Antibiotic inactivation      | β-lactam                                                                      |
| <i>PBP2x, pbp2x_Q557E</i>                                                                                                                        | Chromosome                                                                   | Antibiotic target alteration |                                                                               |
| <i>bleSh</i>                                                                                                                                     | Transposon                                                                   | Antibiotic target alteration |                                                                               |
| <i>vanG, vanRG</i> <sup>4</sup> , <i>vanTG</i> <sup>4</sup> , <i>vanUG</i> <sup>4</sup> , <i>vanWG</i> <sup>4</sup> , <i>vanYG1</i> <sup>4</sup> | Chromosome                                                                   |                              |                                                                               |
| <i>vanR</i> <sup>5</sup>                                                                                                                         | Chromosome                                                                   |                              |                                                                               |
| <i>vanXY</i>                                                                                                                                     | Chromosome                                                                   |                              |                                                                               |
| <i>vanW</i> <sup>6</sup>                                                                                                                         | unknown                                                                      |                              | unknown                                                                       |

|              |                |                               |                         |
|--------------|----------------|-------------------------------|-------------------------|
| <i>dfpF</i>  | Chromosome     | Antibiotic target replacement | Diaminopyrimidine       |
| <i>optrA</i> | Plasmid        | antibiotic target protection  | Oxazolidinone, phenicol |
| <i>vat</i>   | Mobile element | Antibiotic inactivation       | Streptogramin           |

<sup>1</sup> Tetracycline resistance genes are often found on the same mobile element as erythromycin resistance genes. <sup>2</sup> This resistance can be constitutive (cMLS<sub>B</sub>) resistance, or (iMLS<sub>B</sub>) resistance; iMLS<sub>B</sub> is mediated by *mef* gene. <sup>3</sup> Confers resistance to 15-membered ring macrolides (M phenotype) only, while *erm*(B) determines cross-resistance to all macrolides, lincosamides, and streptogramins B. <sup>4</sup> are all variant found in the *vanG* gene cluster. <sup>5</sup> Is a OmpR-family transcriptional activator in the VanSR regulatory system, after activation by *VanS*, it promotes cotranscription of *VanA*, *VanH*, and *VanX*. <sup>6</sup> Found in vancomycin resistance gene clusters *vanB* and *vanG*.
